# Supplementary material for: Metabolomic profiling identifies novel associations with Electrolyte and Acid-Base Homeostatic patterns
Source: PubMed Central journal article supplement (PMC6803625; doi:10.1038/s41598-019-51492-3), 2019-10-21
Supplement: 41598_2019_51492_MOESM1_ESM.pdf [file 41598_2019_51492_MOESM1_ESM.pdf]

## **Metabolomic profiling identifies novel associations with Electrolyte and Acid-Base Homeostatic patterns**

Cristina Menni<sup>1,\*</sup>, Lindsay Mccallum<sup>2,\*</sup>, Maik Pietzner<sup>3,4</sup>, Jonas Zierer<sup>1,5</sup>, Alisha Aman<sup>2</sup>, Karsten Suhre<sup>6</sup>, Robert P Mohney<sup>7</sup>, Massimo Mangino<sup>1</sup>, Nele Friedrich<sup>3</sup>, Tim D Spector<sup>1</sup>, Sandosh Padmanabhan<sup>2</sup>

### **Supplementary material**

#### **Table of contents:**

**Table S1.** List of metabolites significantly associated with one or more electrolytes

**Table S1. List of metabolites significantly associated with one or more electrolytes**

| Super | Sub Pathway                               | Metabolite           | Chloride     |              |                 | Potassium    |              |                 | Bicarbonate |              |                 | Sodium      |              |                 |
|-------|-------------------------------------------|----------------------|--------------|--------------|-----------------|--------------|--------------|-----------------|-------------|--------------|-----------------|-------------|--------------|-----------------|
|       |                                           |                      | Beta         | SE           | P               | Beta         | SE           | P               | Beta        | SE           | P               | Beta        | SE           | P               |
| aa    | Alanine and Aspartate Metabolism          | asparagine           | -0.04        | 0.059        | 5.11E-01        | -0.01        | 0.008        | 1.73E-01        | <b>0.29</b> | <b>0.053</b> | <b>3.56E-08</b> | 0.06        | 0.048        | 2.41E-01        |
| aa    | Alanine and Aspartate Metabolism          | aspartate            | <b>-0.40</b> | <b>0.089</b> | <b>7.34E-06</b> | -0.02        | 0.012        | 7.47E-02        | -0.02       | 0.083        | 7.89E-01        | -0.08       | 0.074        | 2.57E-01        |
| aa    | Glutamate Metabolism                      | glutamine            | -0.08        | 0.064        | 2.19E-01        | 0.00         | 0.008        | 5.59E-01        | <b>0.50</b> | <b>0.057</b> | <b>8.79E-19</b> | <b>0.26</b> | <b>0.052</b> | <b>3.92E-07</b> |
| aa    | Glutathione Metabolism                    | 5-oxoproline         | -0.25        | 0.063        | 9.23E-05        | -0.02        | 0.008        | 3.59E-02        | <b>0.34</b> | <b>0.057</b> | <b>2.36E-09</b> | 0.09        | 0.052        | 7.85E-02        |
| aa    | Glycine, Serine and Threonine Metabolism  | glycine              | 0.07         | 0.062        | 2.61E-01        | -0.01        | 0.008        | 2.38E-01        | <b>0.35</b> | <b>0.056</b> | <b>3.86E-10</b> | <b>0.28</b> | <b>0.050</b> | <b>2.50E-08</b> |
| aa    | Glycine, Serine and Threonine Metabolism  | threonine            | -0.03        | 0.056        | 5.34E-01        | 0.00         | 0.007        | 5.67E-01        | <b>0.28</b> | <b>0.050</b> | <b>1.84E-08</b> | 0.00        | 0.045        | 9.32E-01        |
| aa    | Leucine, Isoleucine and Valine Metabolism | 3-hydroxyisobutyrate | -0.09        | 0.064        | 1.78E-01        | <b>-0.04</b> | <b>0.008</b> | <b>6.77E-07</b> | -0.07       | 0.059        | 2.61E-01        | -0.14       | 0.052        | 6.70E-03        |

|           |                                                           |                      |              |              |                 |       |       |          |              |              |                 |             |              |                            |
|-----------|-----------------------------------------------------------|----------------------|--------------|--------------|-----------------|-------|-------|----------|--------------|--------------|-----------------|-------------|--------------|----------------------------|
| <b>aa</b> | Leucine,<br>Isoleucine and<br>Valine<br>Metabolism        | isovalerate          | -0.34        | 0.087        | 8.34E-05        | -0.01 | 0.012 | 5.10E-01 | <b>-0.36</b> | <b>0.081</b> | <b>8.10E-06</b> | -0.09       | 0.073        | 1.95<br>E-01               |
| <b>aa</b> | Lysine<br>Metabolism                                      | lysine               | -0.27        | 0.063        | 2.10E-05        | 0.00  | 0.008 | 8.45E-01 | <b>0.45</b>  | <b>0.057</b> | <b>2.15E-15</b> | 0.06        | 0.052        | 2.13<br>E-01               |
| <b>aa</b> | Methionine,<br>Cysteine, SAM<br>and Taurine<br>Metabolism | cystathionine        | 0.24         | 0.077        | 2.15E-03        | 0.03  | 0.010 | 6.91E-03 | 0.00         | 0.070        | 9.87E-01        | <b>0.39</b> | <b>0.062</b> | <b>2.67</b><br><b>E-10</b> |
| <b>aa</b> | Methionine,<br>Cysteine, SAM<br>and Taurine<br>Metabolism | cysteine             | 0.20         | 0.076        | 1.00E-02        | -0.02 | 0.010 | 8.37E-02 | <b>0.33</b>  | <b>0.070</b> | <b>2.35E-06</b> | 0.15        | 0.063        | 1.52<br>E-02               |
| <b>aa</b> | Methionine,<br>Cysteine, SAM<br>and Taurine<br>Metabolism | cystine              | 0.06         | 0.084        | 4.72E-01        | 0.02  | 0.011 | 9.55E-02 | 0.10         | 0.077        | 2.08E-01        | <b>0.31</b> | <b>0.069</b> | <b>6.78</b><br><b>E-06</b> |
| <b>aa</b> | Methionine,<br>Cysteine, SAM<br>and Taurine<br>Metabolism | methionine sulfoxide | <b>-0.44</b> | <b>0.097</b> | <b>6.25E-06</b> | -0.02 | 0.013 | 1.57E-01 | -0.22        | 0.092        | 1.54E-02        | -0.18       | 0.083        | 2.92<br>E-02               |
| <b>aa</b> | Methionine,<br>Cysteine, SAM                              | N-acetylmethionine   | <b>0.33</b>  | <b>0.066</b> | <b>7.65E-07</b> | -0.03 | 0.009 | 3.63E-03 | -0.02        | 0.061        | 7.84E-01        | 0.16        | 0.055        | 4.17<br>E-03               |

|           |                                                  |                         |             |              |                 |      |       |          |              |              |                 |       |       |          |
|-----------|--------------------------------------------------|-------------------------|-------------|--------------|-----------------|------|-------|----------|--------------|--------------|-----------------|-------|-------|----------|
|           | and Taurine Metabolism                           |                         |             |              |                 |      |       |          |              |              |                 |       |       |          |
| <b>aa</b> | Methionine, Cysteine, SAM and Taurine Metabolism | N-formylmethionine      | <b>0.37</b> | <b>0.079</b> | <b>3.22E-06</b> | 0.00 | 0.010 | 6.56E-01 | 0.17         | 0.073        | 1.69E-02        | 0.18  | 0.065 | 6.31E-03 |
| <b>aa</b> | Methionine, Cysteine, SAM and Taurine Metabolism | S-methylcysteine        | 0.00        | 0.062        | 9.91E-01        | 0.00 | 0.008 | 8.50E-01 | <b>0.26</b>  | <b>0.056</b> | <b>2.68E-06</b> | 0.12  | 0.051 | 1.41E-02 |
| <b>aa</b> | Phenylalanine and Tyrosine Metabolism            | 2-hydroxyphenylacetate  | 0.22        | 0.063        | 3.97E-04        | 0.02 | 0.008 | 6.01E-03 | <b>-0.33</b> | <b>0.057</b> | <b>9.24E-09</b> | 0.09  | 0.051 | 7.63E-02 |
| <b>aa</b> | Phenylalanine and Tyrosine Metabolism            | 4-hydroxyphenylpyruvate | 0.18        | 0.082        | 3.21E-02        | 0.00 | 0.011 | 6.80E-01 | <b>0.38</b>  | <b>0.075</b> | <b>4.89E-07</b> | 0.05  | 0.067 | 4.45E-01 |
| <b>aa</b> | Phenylalanine and Tyrosine Metabolism            | N-acetylphenylalanine   | 0.04        | 0.069        | 5.85E-01        | 0.00 | 0.009 | 6.59E-01 | <b>-0.33</b> | <b>0.062</b> | <b>7.35E-08</b> | 0.06  | 0.056 | 3.19E-01 |
| <b>aa</b> | Phenylalanine and Tyrosine Metabolism            | phenylpyruvate          | 0.05        | 0.064        | 4.58E-01        | 0.00 | 0.008 | 6.71E-01 | <b>0.25</b>  | <b>0.058</b> | <b>1.50E-05</b> | -0.02 | 0.053 | 6.66E-01 |

|    |                                             |                                |       |       |          |             |              |                 |              |              |                 |              |              |                      |
|----|---------------------------------------------|--------------------------------|-------|-------|----------|-------------|--------------|-----------------|--------------|--------------|-----------------|--------------|--------------|----------------------|
| aa | Phenylalanine and Tyrosine Metabolism       | tyrosine                       | -0.06 | 0.065 | 3.46E-01 | -0.02       | 0.008        | 3.60E-03        | <b>0.27</b>  | <b>0.059</b> | <b>5.68E-06</b> | 0.06         | 0.053        | 2.49<br>E-01         |
| aa | Polyamine Metabolism                        | N-acetylputrescine             | -0.16 | 0.064 | 1.37E-02 | 0.00        | 0.008        | 9.20E-01        | -0.10        | 0.058        | 9.80E-02        | <b>-0.23</b> | <b>0.051</b> | <b>5.61<br/>E-06</b> |
| aa | Tryptophan Metabolism                       | indolelactate                  | 0.06  | 0.067 | 3.58E-01 | <b>0.04</b> | <b>0.009</b> | <b>9.47E-07</b> | -0.13        | 0.061        | 3.73E-02        | 0.01         | 0.054        | 8.66<br>E-01         |
| aa | Tryptophan Metabolism                       | N-acetyltryptophan             | -0.06 | 0.071 | 3.88E-01 | 0.01        | 0.009        | 1.87E-01        | <b>-0.36</b> | <b>0.065</b> | <b>3.13E-08</b> | 0.05         | 0.058        | 3.68<br>E-01         |
| aa | Urea cycle; Arginine and Proline Metabolism | arginine                       | 0.01  | 0.062 | 8.68E-01 | 0.02        | 0.008        | 4.63E-02        | <b>0.27</b>  | <b>0.056</b> | <b>1.75E-06</b> | 0.14         | 0.050        | 5.12<br>E-03         |
| aa | Urea cycle; Arginine and Proline Metabolism | citrulline                     | 0.09  | 0.066 | 1.70E-01 | -0.02       | 0.008        | 9.29E-03        | <b>0.43</b>  | <b>0.059</b> | <b>4.31E-13</b> | 0.12         | 0.054        | 2.38<br>E-02         |
| aa | Urea cycle; Arginine and Proline Metabolism | dimethylarginine (SDMA + ADMA) | 0.08  | 0.065 | 2.44E-01 | 0.00        | 0.008        | 7.42E-01        | <b>0.29</b>  | <b>0.059</b> | <b>6.93E-07</b> | 0.15         | 0.053        | 3.87<br>E-03         |
| aa | Urea cycle; Arginine and                    | N-acetylcitrulline             | 0.09  | 0.069 | 1.81E-01 | 0.01        | 0.009        | 4.18E-01        | 0.11         | 0.063        | 7.99E-02        | <b>0.31</b>  | <b>0.056</b> | <b>3.01<br/>E-08</b> |

|                |                                                      |                 |              |              |                 |              |              |                 |             |              |                 |             |              |                 |
|----------------|------------------------------------------------------|-----------------|--------------|--------------|-----------------|--------------|--------------|-----------------|-------------|--------------|-----------------|-------------|--------------|-----------------|
|                | Proline Metabolism                                   |                 |              |              |                 |              |              |                 |             |              |                 |             |              |                 |
| <b>aa</b>      | Urea cycle; Arginine and Proline Metabolism          | ornithine       | -0.04        | 0.063        | 5.15E-01        | -0.03        | 0.008        | 7.54E-04        | <b>0.35</b> | <b>0.057</b> | <b>7.13E-10</b> | <b>0.27</b> | <b>0.051</b> | <b>2.53E-07</b> |
| <b>aa</b>      | Urea cycle; Arginine and Proline Metabolism          | pro-hydroxy-pro | 0.15         | 0.067        | 2.18E-02        | 0.00         | 0.009        | 8.13E-01        | 0.16        | 0.061        | 8.57E-03        | <b>0.29</b> | <b>0.054</b> | <b>1.00E-07</b> |
| <b>aa</b>      | Urea cycle; Arginine and Proline Metabolism          | proline         | 0.01         | 0.063        | 8.38E-01        | -0.02        | 0.008        | 6.86E-03        | 0.21        | 0.057        | 3.46E-04        | <b>0.23</b> | <b>0.051</b> | <b>6.03E-06</b> |
| <b>ch</b>      | Glycolysis, Gluconeogenesis, and Pyruvate Metabolism | glycerate       | <b>-0.38</b> | <b>0.069</b> | <b>3.33E-08</b> | 0.00         | 0.009        | 8.09E-01        | 0.16        | 0.063        | 1.00E-02        | -0.22       | 0.056        | 7.15E-05        |
| <b>c&amp;v</b> | Ascorbate and Aldarate Metabolism                    | oxalate         | <b>-0.42</b> | <b>0.080</b> | <b>1.37E-07</b> | 0.00         | 0.010        | 8.46E-01        | 0.31        | 0.073        | 2.90E-05        | -0.18       | 0.066        | 6.19E-03        |
| <b>c&amp;v</b> | Ascorbate and Aldarate Metabolism                    | threonate       | <b>-0.43</b> | <b>0.074</b> | <b>4.79E-09</b> | <b>-0.05</b> | <b>0.010</b> | <b>2.24E-06</b> | 0.17        | 0.068        | 1.25E-02        | -0.17       | 0.060        | 4.74E-03        |

|                |                                        |                             |       |       |          |              |              |                 |              |              |                 |             |              |                            |
|----------------|----------------------------------------|-----------------------------|-------|-------|----------|--------------|--------------|-----------------|--------------|--------------|-----------------|-------------|--------------|----------------------------|
| <b>c&amp;v</b> | Hemoglobin and Porphyrin Metabolism    | bilirubin (E,E)*            | -0.10 | 0.062 | 1.04E-01 | <b>-0.05</b> | <b>0.008</b> | <b>8.45E-10</b> | 0.14         | 0.056        | 1.59E-02        | -0.02       | 0.050        | 6.69<br>E-01               |
| <b>c&amp;v</b> | Tocopherol Metabolism                  | alpha-tocopherol            | 0.01  | 0.064 | 8.25E-01 | -0.02        | 0.008        | 2.97E-02        | <b>0.32</b>  | <b>0.058</b> | <b>5.28E-08</b> | 0.04        | 0.052        | 4.49<br>E-01               |
| <b>e</b>       | TCA Cycle                              | 2-methylcitrate/homocitrate | -0.01 | 0.061 | 9.15E-01 | 0.01         | 0.008        | 4.14E-01        | <b>-0.26</b> | <b>0.055</b> | <b>2.19E-06</b> | -0.03       | 0.049        | 5.18<br>E-01               |
| <b>e</b>       | TCA Cycle                              | cis-aconitate               | -0.16 | 0.072 | 2.64E-02 | <b>-0.05</b> | <b>0.009</b> | <b>1.59E-08</b> | -0.07        | 0.066        | 2.94E-01        | -0.13       | 0.059        | 2.35<br>E-02               |
| <b>e</b>       | TCA Cycle                              | citrate                     | -0.11 | 0.067 | 1.08E-01 | <b>-0.05</b> | <b>0.009</b> | <b>1.52E-08</b> | -0.07        | 0.061        | 2.38E-01        | -0.17       | 0.054        | 2.07<br>E-03               |
| <b>e</b>       | TCA Cycle                              | fumarate                    | -0.18 | 0.065 | 6.31E-03 | <b>-0.07</b> | <b>0.008</b> | <b>7.24E-16</b> | -0.09        | 0.060        | 1.28E-01        | -0.02       | 0.053        | 7.20<br>E-01               |
| <b>e</b>       | TCA Cycle                              | malate                      | -0.14 | 0.069 | 3.67E-02 | <b>-0.04</b> | <b>0.009</b> | <b>6.20E-06</b> | 0.02         | 0.064        | 7.71E-01        | -0.05       | 0.057        | 4.30<br>E-01               |
| <b>l</b>       | Carnitine Metabolism                   | deoxycarnitine              | 0.08  | 0.063 | 2.14E-01 | 0.02         | 0.008        | 2.32E-02        | 0.12         | 0.057        | 3.05E-02        | <b>0.24</b> | <b>0.050</b> | <b>1.48</b><br><b>E-06</b> |
| <b>l</b>       | Fatty Acid Metabolism (Acyl Carnitine) | decanoylcarnitine           | -0.15 | 0.064 | 2.19E-02 | <b>-0.04</b> | <b>0.008</b> | <b>5.12E-06</b> | 0.18         | 0.058        | 2.33E-03        | 0.01        | 0.052        | 8.31<br>E-01               |
| <b>l</b>       | Fatty Acid Metabolism (Acyl Carnitine) | laurylcarnitine             | -0.16 | 0.064 | 1.26E-02 | <b>-0.04</b> | <b>0.008</b> | <b>2.24E-06</b> | 0.14         | 0.058        | 1.33E-02        | -0.01       | 0.052        | 7.84<br>E-01               |

|   |                                        |                        |       |       |          |              |              |                 |      |       |          |       |       |          |
|---|----------------------------------------|------------------------|-------|-------|----------|--------------|--------------|-----------------|------|-------|----------|-------|-------|----------|
| I | Fatty Acid Metabolism (Acyl Carnitine) | linoleoylcarnitine*    | -0.11 | 0.063 | 6.72E-02 | <b>-0.05</b> | <b>0.008</b> | <b>1.29E-10</b> | 0.11 | 0.057 | 5.32E-02 | 0.07  | 0.051 | 1.57E-01 |
| I | Fatty Acid Metabolism (Acyl Carnitine) | myristoleoylcarnitine* | -0.15 | 0.067 | 2.49E-02 | <b>-0.05</b> | <b>0.009</b> | <b>3.53E-09</b> | 0.19 | 0.061 | 1.71E-03 | -0.04 | 0.055 | 5.09E-01 |
| I | Fatty Acid Metabolism (Acyl Carnitine) | octanoylcarnitine      | -0.12 | 0.064 | 5.30E-02 | <b>-0.04</b> | <b>0.008</b> | <b>2.97E-06</b> | 0.19 | 0.059 | 1.01E-03 | 0.03  | 0.052 | 5.88E-01 |
| I | Fatty Acid Metabolism (Acyl Carnitine) | oleoylcarnitine        | -0.15 | 0.070 | 3.38E-02 | <b>-0.07</b> | <b>0.009</b> | <b>1.83E-13</b> | 0.11 | 0.064 | 9.28E-02 | 0.00  | 0.057 | 9.53E-01 |
| I | Fatty Acid Metabolism (Acyl Carnitine) | palmitoylcarnitine     | -0.18 | 0.071 | 9.51E-03 | <b>-0.04</b> | <b>0.009</b> | <b>1.59E-06</b> | 0.05 | 0.065 | 4.80E-01 | -0.02 | 0.058 | 7.36E-01 |
| I | Fatty Acid, Branched                   | 15-methylpalmitate     | -0.05 | 0.063 | 3.89E-01 | <b>-0.04</b> | <b>0.008</b> | <b>5.94E-06</b> | 0.15 | 0.057 | 1.09E-02 | -0.04 | 0.051 | 4.74E-01 |
| I | Fatty Acid, Branched                   | 17-methylstearate      | -0.07 | 0.061 | 2.58E-01 | <b>-0.04</b> | <b>0.008</b> | <b>2.33E-06</b> | 0.16 | 0.055 | 4.06E-03 | -0.04 | 0.049 | 4.29E-01 |
| I | Fatty Acid, Dicarboxylate              | dodecanedioate         | -0.10 | 0.061 | 9.96E-02 | <b>-0.04</b> | <b>0.008</b> | <b>5.90E-07</b> | 0.09 | 0.056 | 1.30E-01 | 0.04  | 0.050 | 4.24E-01 |
| I | Fatty Acid, Dicarboxylate              | hexadecanedioate       | -0.18 | 0.069 | 9.57E-03 | <b>-0.06</b> | <b>0.009</b> | <b>3.47E-12</b> | 0.07 | 0.064 | 3.04E-01 | -0.14 | 0.057 | 1.10E-02 |



|   |                              |                          |              |              |                 |              |              |                 |              |              |                 |       |       |              |
|---|------------------------------|--------------------------|--------------|--------------|-----------------|--------------|--------------|-----------------|--------------|--------------|-----------------|-------|-------|--------------|
| I | Fatty Acid,<br>Dicarboxylate | octadecanedioate         | -0.19        | 0.062        | 2.04E-03        | <b>-0.04</b> | <b>0.008</b> | <b>4.38E-07</b> | 0.01         | 0.057        | 9.03E-01        | -0.08 | 0.050 | 1.14<br>E-01 |
| I | Fatty Acid,<br>Dicarboxylate | pimelate (heptanedioate) | -0.22        | 0.065        | 7.47E-04        | 0.00         | 0.009        | 8.38E-01        | <b>-0.28</b> | <b>0.060</b> | <b>2.03E-06</b> | -0.11 | 0.054 | 3.48<br>E-02 |
| I | Fatty Acid,<br>Dicarboxylate | sebacate (decanedioate)  | -0.12        | 0.079        | 1.36E-01        | <b>-0.05</b> | <b>0.010</b> | <b>6.31E-07</b> | 0.04         | 0.072        | 5.92E-01        | 0.04  | 0.064 | 5.56<br>E-01 |
| I | Fatty Acid,<br>Dicarboxylate | suberate (octanedioate)  | <b>-0.29</b> | <b>0.066</b> | <b>1.49E-05</b> | 0.00         | 0.009        | 6.60E-01        | <b>-0.34</b> | <b>0.061</b> | <b>3.92E-08</b> | -0.14 | 0.055 | 1.31<br>E-02 |
| I | Fatty Acid,<br>Dicarboxylate | tetradecanedioate        | -0.15        | 0.063        | 2.05E-02        | <b>-0.05</b> | <b>0.008</b> | <b>1.84E-10</b> | 0.07         | 0.058        | 2.15E-01        | -0.10 | 0.052 | 5.35<br>E-02 |
| I | Fatty Acid,<br>Monohydroxy   | 16-hydroxypalmitate      | -0.19        | 0.061        | 2.01E-03        | <b>-0.05</b> | <b>0.008</b> | <b>2.23E-09</b> | 0.11         | 0.056        | 4.60E-02        | -0.12 | 0.050 | 1.92<br>E-02 |
| I | Fatty Acid,<br>Monohydroxy   | 2-hydroxydecanoate       | -0.08        | 0.060        | 1.80E-01        | <b>-0.04</b> | <b>0.008</b> | <b>8.62E-07</b> | 0.09         | 0.055        | 9.38E-02        | -0.01 | 0.049 | 8.66<br>E-01 |
| I | Fatty Acid,<br>Monohydroxy   | 3-hydroxydecanoate       | -0.17        | 0.062        | 5.32E-03        | <b>-0.06</b> | <b>0.008</b> | <b>1.55E-13</b> | 0.11         | 0.057        | 4.53E-02        | -0.10 | 0.051 | 4.07<br>E-02 |
| I | Fatty Acid,<br>Monohydroxy   | 3-hydroxylaurate         | -0.19        | 0.063        | 2.97E-03        | <b>-0.06</b> | <b>0.008</b> | <b>1.31E-12</b> | 0.17         | 0.058        | 4.06E-03        | -0.13 | 0.051 | 1.25<br>E-02 |
| I | Fatty Acid,<br>Monohydroxy   | 3-hydroxyoctanoate       | -0.21        | 0.060        | 3.77E-04        | <b>-0.04</b> | <b>0.008</b> | <b>1.24E-06</b> | -0.10        | 0.056        | 8.01E-02        | -0.08 | 0.050 | 9.06<br>E-02 |
| I | Fatty Acid,<br>Monohydroxy   | 3-hydroxysebacate        | -0.11        | 0.069        | 1.24E-01        | <b>-0.05</b> | <b>0.009</b> | <b>4.48E-09</b> | -0.05        | 0.063        | 4.07E-01        | -0.05 | 0.056 | 4.16<br>E-01 |
| I | Glycerol<br>Metabolism       | glycerol                 | -0.05        | 0.065        | 4.41E-01        | <b>-0.04</b> | <b>0.008</b> | <b>9.01E-08</b> | -0.03        | 0.060        | 6.44E-01        | -0.08 | 0.053 | 1.44<br>E-01 |

|   |                       |                            |       |       |          |              |              |                 |      |       |          |       |       |              |
|---|-----------------------|----------------------------|-------|-------|----------|--------------|--------------|-----------------|------|-------|----------|-------|-------|--------------|
| I | Ketone Bodies         | 3-hydroxybutyrate (BHBA)   | -0.08 | 0.064 | 2.20E-01 | <b>-0.06</b> | <b>0.008</b> | <b>5.62E-13</b> | 0.05 | 0.059 | 4.34E-01 | -0.17 | 0.052 | 1.07<br>E-03 |
| I | Long Chain Fatty Acid | 10-heptadecenoate (17:1n7) | -0.06 | 0.063 | 3.37E-01 | <b>-0.05</b> | <b>0.008</b> | <b>1.07E-08</b> | 0.13 | 0.058 | 2.44E-02 | -0.09 | 0.052 | 7.66<br>E-02 |
| I | Long Chain Fatty Acid | 10-nonadecenoate (19:1n9)  | -0.03 | 0.061 | 6.11E-01 | <b>-0.05</b> | <b>0.008</b> | <b>2.46E-09</b> | 0.09 | 0.056 | 9.73E-02 | -0.08 | 0.050 | 1.04<br>E-01 |
| I | Long Chain Fatty Acid | arachidate (20:0)          | -0.09 | 0.056 | 1.17E-01 | <b>-0.03</b> | <b>0.007</b> | <b>1.28E-05</b> | 0.10 | 0.051 | 4.32E-02 | -0.04 | 0.045 | 4.31<br>E-01 |
| I | Long Chain Fatty Acid | eicosenoate (20:1)         | -0.10 | 0.060 | 9.06E-02 | <b>-0.05</b> | <b>0.008</b> | <b>4.30E-11</b> | 0.08 | 0.055 | 1.38E-01 | -0.11 | 0.049 | 2.13<br>E-02 |
| I | Long Chain Fatty Acid | margarate (17:0)           | -0.07 | 0.062 | 2.33E-01 | <b>-0.04</b> | <b>0.008</b> | <b>9.19E-08</b> | 0.14 | 0.057 | 1.18E-02 | -0.07 | 0.051 | 1.86<br>E-01 |
| I | Long Chain Fatty Acid | myristate (14:0)           | -0.08 | 0.062 | 2.23E-01 | <b>-0.05</b> | <b>0.008</b> | <b>1.20E-09</b> | 0.11 | 0.057 | 5.15E-02 | -0.10 | 0.051 | 4.09<br>E-02 |
| I | Long Chain Fatty Acid | myristoleate (14:1n5)      | -0.10 | 0.064 | 1.20E-01 | <b>-0.06</b> | <b>0.008</b> | <b>1.97E-14</b> | 0.18 | 0.059 | 2.14E-03 | -0.11 | 0.052 | 3.90<br>E-02 |
| I | Long Chain Fatty Acid | nonadecanoate (19:0)       | -0.10 | 0.059 | 8.56E-02 | <b>-0.04</b> | <b>0.008</b> | <b>3.51E-06</b> | 0.18 | 0.054 | 7.12E-04 | -0.02 | 0.048 | 6.77<br>E-01 |
| I | Long Chain Fatty Acid | oleate/vaccenate (18:1)    | -0.06 | 0.062 | 3.60E-01 | <b>-0.05</b> | <b>0.008</b> | <b>1.89E-11</b> | 0.10 | 0.057 | 6.60E-02 | -0.10 | 0.051 | 4.41<br>E-02 |
| I | Long Chain Fatty Acid | palmitate (16:0)           | -0.12 | 0.063 | 5.41E-02 | <b>-0.04</b> | <b>0.008</b> | <b>2.80E-07</b> | 0.12 | 0.058 | 3.70E-02 | -0.12 | 0.052 | 1.66<br>E-02 |
| I | Long Chain Fatty Acid | palmitoleate (16:1n7)      | -0.11 | 0.065 | 8.26E-02 | <b>-0.05</b> | <b>0.008</b> | <b>4.74E-10</b> | 0.16 | 0.060 | 8.02E-03 | -0.14 | 0.054 | 7.59<br>E-03 |

|   |                         |                                             |       |       |          |              |              |                 |             |              |                 |              |              |                 |
|---|-------------------------|---------------------------------------------|-------|-------|----------|--------------|--------------|-----------------|-------------|--------------|-----------------|--------------|--------------|-----------------|
| I | Long Chain Fatty Acid   | stearate (18:0)                             | -0.11 | 0.061 | 7.55E-02 | <b>-0.04</b> | <b>0.008</b> | <b>2.77E-06</b> | 0.16        | 0.055        | 4.81E-03        | -0.06        | 0.049        | 2.63E-01        |
| I | Lysolipid               | 1-arachidonoyl-GPA (20:4)                   | -0.19 | 0.066 | 3.36E-03 | <b>-0.05</b> | <b>0.009</b> | <b>9.47E-08</b> | 0.10        | 0.061        | 8.93E-02        | -0.06        | 0.054        | 3.11E-01        |
| I | Lysolipid               | 1-docosapentaenoyl-GPC (22:5n3)*            | -0.11 | 0.064 | 8.61E-02 | 0.02         | 0.008        | 6.18E-03        | <b>0.34</b> | <b>0.057</b> | <b>2.43E-09</b> | 0.14         | 0.051        | 5.49E-03        |
| I | Lysolipid               | 1-linoleoyl-GPA (18:2)*                     | -0.15 | 0.070 | 3.76E-02 | <b>-0.04</b> | <b>0.009</b> | <b>2.74E-06</b> | 0.20        | 0.065        | 1.86E-03        | 0.06         | 0.058        | 2.65E-01        |
| I | Lysolipid               | 1-palmitoyl-GPE (16:0)                      | -0.24 | 0.061 | 6.62E-05 | 0.00         | 0.008        | 9.83E-01        | -0.03       | 0.056        | 5.62E-01        | <b>-0.21</b> | <b>0.049</b> | <b>1.26E-05</b> |
| I | Medium Chain Fatty Acid | 10-undecenoate (11:1n1)                     | -0.10 | 0.063 | 1.13E-01 | <b>-0.04</b> | <b>0.008</b> | <b>5.60E-06</b> | 0.13        | 0.058        | 2.32E-02        | -0.05        | 0.051        | 3.48E-01        |
| I | Medium Chain Fatty Acid | 5-dodecenoate (12:1n7)                      | -0.14 | 0.062 | 2.00E-02 | <b>-0.06</b> | <b>0.008</b> | <b>1.83E-13</b> | 0.21        | 0.057        | 2.31E-04        | -0.07        | 0.051        | 1.46E-01        |
| I | Medium Chain Fatty Acid | caprate (10:0)                              | -0.10 | 0.059 | 8.62E-02 | <b>-0.05</b> | <b>0.008</b> | <b>2.55E-09</b> | 0.09        | 0.054        | 9.31E-02        | -0.02        | 0.049        | 6.95E-01        |
| I | Medium Chain Fatty Acid | caprylate (8:0)                             | -0.09 | 0.058 | 1.39E-01 | <b>-0.04</b> | <b>0.007</b> | <b>2.64E-07</b> | 0.07        | 0.053        | 1.97E-01        | 0.01         | 0.047        | 8.49E-01        |
| I | Medium Chain Fatty Acid | laurate (12:0)                              | -0.09 | 0.058 | 1.08E-01 | <b>-0.04</b> | <b>0.007</b> | <b>2.55E-09</b> | 0.13        | 0.054        | 1.96E-02        | -0.03        | 0.048        | 4.76E-01        |
| I | Phospholipid Metabolism | 1-palmitoyl-2-arachidonoyl-GPE (16:0/20:4)* | -0.09 | 0.062 | 1.56E-01 | 0.00         | 0.008        | 8.40E-01        | -0.03       | 0.057        | 5.88E-01        | <b>-0.24</b> | <b>0.050</b> | <b>1.65E-06</b> |

|   |                                        |                                                |       |       |          |              |              |                 |             |              |                 |              |              |                  |
|---|----------------------------------------|------------------------------------------------|-------|-------|----------|--------------|--------------|-----------------|-------------|--------------|-----------------|--------------|--------------|------------------|
| I | Phospholipid Metabolism                | 1-palmitoyl-2-docosahexaenoyl-GPE (16:0/22:6)* | -0.14 | 0.062 | 2.20E-02 | -0.01        | 0.008        | 4.54E-01        | -0.05       | 0.056        | 3.97E-01        | <b>-0.27</b> | <b>0.049</b> | <b>6.94 E-08</b> |
| I | Phospholipid Metabolism                | 1-palmitoyl-2-palmitoleoyl-GPC (16:0/16:1)*    | -0.13 | 0.062 | 3.88E-02 | 0.02         | 0.008        | 4.96E-02        | -0.06       | 0.056        | 3.28E-01        | <b>-0.22</b> | <b>0.050</b> | <b>1.01 E-05</b> |
| I | Phospholipid Metabolism                | glycerophosphoinositol*                        | -0.09 | 0.065 | 1.90E-01 | 0.01         | 0.008        | 1.03E-01        | <b>0.26</b> | <b>0.059</b> | <b>1.04E-05</b> | 0.02         | 0.053        | 7.24 E-01        |
| I | Phospholipid Metabolism                | glycerophosphorylcholine (GPC)                 | -0.20 | 0.064 | 2.00E-03 | 0.01         | 0.008        | 2.89E-01        | <b>0.27</b> | <b>0.057</b> | <b>1.64E-06</b> | 0.11         | 0.051        | 2.99 E-02        |
| I | Polyunsaturated Fatty Acid (n3 and n6) | dihomo-linoleate (20:2n6)                      | -0.10 | 0.058 | 9.49E-02 | <b>-0.04</b> | <b>0.007</b> | <b>1.23E-08</b> | 0.08        | 0.053        | 1.16E-01        | -0.08        | 0.048        | 9.03 E-02        |
| I | Polyunsaturated Fatty Acid (n3 and n6) | docosadienoate (22:2n6)                        | -0.10 | 0.054 | 5.32E-02 | <b>-0.04</b> | <b>0.007</b> | <b>4.57E-08</b> | 0.06        | 0.049        | 2.53E-01        | -0.08        | 0.044        | 6.27 E-02        |
| I | Polyunsaturated Fatty Acid (n3 and n6) | linoleate (18:2n6)                             | -0.09 | 0.058 | 1.27E-01 | <b>-0.04</b> | <b>0.007</b> | <b>2.66E-09</b> | 0.12        | 0.053        | 2.32E-02        | -0.07        | 0.048        | 1.63 E-01        |
| I | Polyunsaturated Fatty Acid (n3 and n6) | linolenate [alpha or gamma; (18:3n3 or 6)]     | -0.11 | 0.060 | 7.13E-02 | <b>-0.05</b> | <b>0.008</b> | <b>1.94E-12</b> | 0.14        | 0.055        | 1.47E-02        | -0.08        | 0.050        | 9.73 E-02        |

|          |                                           |                                             |       |       |          |              |              |                 |              |              |                 |             |              |                  |
|----------|-------------------------------------------|---------------------------------------------|-------|-------|----------|--------------|--------------|-----------------|--------------|--------------|-----------------|-------------|--------------|------------------|
| <b>l</b> | Polyunsaturated Fatty Acid (n3 and n6)    | stearidonate (18:4n3)                       | -0.18 | 0.067 | 7.00E-03 | <b>-0.05</b> | <b>0.009</b> | <b>6.35E-09</b> | 0.19         | 0.062        | 2.72E-03        | -0.08       | 0.055        | 1.35 E-01        |
| <b>l</b> | Sphingolipid Metabolism                   | sphingomyelin (d18:1/20:0, d16:1/22:0)*     | 0.04  | 0.065 | 4.93E-01 | <b>0.04</b>  | <b>0.008</b> | <b>1.20E-06</b> | -0.08        | 0.060        | 1.73E-01        | 0.09        | 0.053        | 1.06 E-01        |
| <b>l</b> | Steroid                                   | 21-hydroxypregnenolone disulfate            | 0.16  | 0.066 | 1.33E-02 | 0.00         | 0.009        | 6.11E-01        | 0.00         | 0.060        | 9.43E-01        | <b>0.28</b> | <b>0.053</b> | <b>2.26 E-07</b> |
| <b>l</b> | Steroid                                   | 5alpha-pregnan-3beta,20alpha-diol disulfate | 0.28  | 0.064 | 1.84E-05 | 0.01         | 0.008        | 4.77E-01        | <b>-0.31</b> | <b>0.058</b> | <b>1.18E-07</b> | 0.04        | 0.052        | 4.59 E-01        |
| <b>l</b> | Steroid                                   | dehydroisoandrosterone sulfate (DHEA-S)     | 0.10  | 0.072 | 1.53E-01 | 0.01         | 0.009        | 1.45E-01        | 0.04         | 0.066        | 5.63E-01        | <b>0.25</b> | <b>0.058</b> | <b>1.61 E-05</b> |
| <b>n</b> | Pyrimidine Metabolism, Orotate containing | dihydrooorotate                             | -0.05 | 0.068 | 4.32E-01 | <b>-0.05</b> | <b>0.009</b> | <b>1.56E-07</b> | 0.14         | 0.062        | 2.74E-02        | 0.21        | 0.055        | 1.10 E-04        |
| <b>n</b> | Pyrimidine Metabolism, Orotate containing | orotate                                     | -0.11 | 0.068 | 9.00E-02 | <b>-0.04</b> | <b>0.009</b> | <b>2.16E-07</b> | -0.06        | 0.062        | 3.43E-01        | -0.07       | 0.055        | 1.80 E-01        |
| <b>n</b> | Pyrimidine Metabolism, Uracil containing  | 5-methyluridine (ribothymidine)             | 0.21  | 0.065 | 1.17E-03 | 0.00         | 0.008        | 8.55E-01        | 0.05         | 0.059        | 4.27E-01        | <b>0.25</b> | <b>0.052</b> | <b>1.55 E-06</b> |

|          |                      |                               |              |              |                 |              |              |                 |              |              |                 |       |       |              |
|----------|----------------------|-------------------------------|--------------|--------------|-----------------|--------------|--------------|-----------------|--------------|--------------|-----------------|-------|-------|--------------|
| <b>p</b> | Dipeptide            | prolylproline                 | -0.12        | 0.062        | 6.27E-02        | 0.01         | 0.008        | 8.72E-02        | <b>-0.30</b> | <b>0.057</b> | <b>1.31E-07</b> | -0.10 | 0.051 | 4.22<br>E-02 |
| <b>p</b> | Gamma-glutamyl aa    | gamma-glutamyl-epsilon-lysine | <b>-0.30</b> | <b>0.067</b> | <b>9.11E-06</b> | 0.00         | 0.009        | 8.19E-01        | <b>0.39</b>  | <b>0.061</b> | <b>1.28E-10</b> | 0.14  | 0.055 | 1.03<br>E-02 |
| <b>p</b> | Gamma-glutamyl aa    | gamma-glutamylglutamine       | -0.26        | 0.064        | 7.25E-05        | -0.01        | 0.008        | 2.53E-01        | <b>0.43</b>  | <b>0.059</b> | <b>2.07E-13</b> | 0.07  | 0.053 | 1.89<br>E-01 |
| <b>p</b> | Gamma-glutamyl aa    | gamma-glutamylmethionine      | 0.01         | 0.065        | 8.69E-01        | -0.02        | 0.008        | 2.02E-02        | <b>0.38</b>  | <b>0.059</b> | <b>2.37E-10</b> | 0.06  | 0.054 | 2.28<br>E-01 |
| <b>p</b> | Gamma-glutamyl aa    | gamma-glutamylthreonine*      | -0.13        | 0.064        | 3.64E-02        | 0.00         | 0.008        | 6.75E-01        | <b>0.44</b>  | <b>0.058</b> | <b>2.00E-14</b> | 0.03  | 0.053 | 5.86<br>E-01 |
| <b>p</b> | Gamma-glutamyl aa    | gamma-glutamyltyrosine        | -0.03        | 0.068        | 6.18E-01        | -0.01        | 0.009        | 2.50E-01        | <b>0.29</b>  | <b>0.062</b> | <b>3.36E-06</b> | 0.19  | 0.055 | 4.47<br>E-04 |
| <b>x</b> | Bacterial/Fungal     | tartronate (hydroxymalonate)  | <b>-0.42</b> | <b>0.077</b> | <b>5.52E-08</b> | 0.00         | 0.010        | 9.59E-01        | 0.29         | 0.070        | 3.41E-05        | -0.15 | 0.063 | 1.91<br>E-02 |
| <b>x</b> | Chemical             | 4-hydroxychlorothalonil       | 0.00         | 0.071        | 9.76E-01        | 0.03         | 0.009        | 2.01E-03        | <b>-0.30</b> | <b>0.065</b> | <b>3.20E-06</b> | 0.10  | 0.058 | 7.22<br>E-02 |
| <b>x</b> | Food Component/Plant | 2-isopropylmalate             | -0.11        | 0.064        | 7.52E-02        | <b>-0.05</b> | <b>0.008</b> | <b>2.53E-08</b> | -0.17        | 0.058        | 3.59E-03        | -0.12 | 0.052 | 1.78<br>E-02 |
| <b>x</b> | Food Component/Plant | methyl indole-3-acetate       | 0.19         | 0.072        | 7.69E-03        | 0.03         | 0.009        | 2.43E-04        | <b>-0.40</b> | <b>0.065</b> | <b>7.05E-10</b> | 0.08  | 0.057 | 1.58<br>E-01 |
